# Supplementary material for: New Ways of Working? A Rapid Exploration of Emerging Evidence Regarding the Care of Older People during COVID19
Source: Int J Environ Res Public Health. 2020 Sep 4;17(18):6442. doi: 10.3390/ijerph17186442 (PMC7558069; doi:10.3390/ijerph17186442)
Supplement: Supplementary file 1 [file ijerph-17-06442-s001.pdf]

**Supplementary file 1:**

**The Twitter Advanced Search Results:**

[https://twitter.com/search?f=live&q=New%20ways%20of%20working%20\(%22Health%22%20OR%20%22Social%20OR%20Care%22%20OR%20Health%20OR%20and%20OR%20Social%20OR%20Care%22\)%20until%3A2020-05-11%20since%3A2020-03-01&src=typed\\_query](https://twitter.com/search?f=live&q=New%20ways%20of%20working%20(%22Health%22%20OR%20%22Social%20OR%20Care%22%20OR%20Health%20OR%20and%20OR%20Social%20OR%20Care%22)%20until%3A2020-05-11%20since%3A2020-03-01&src=typed_query)

**Supplementary file 2:**

**Table S1.** Newspaper Extraction Template.

| Title of article                                                                               |
|------------------------------------------------------------------------------------------------|
| Source                                                                                         |
| Byline or Author(s)                                                                            |
| Date of publication                                                                            |
| Country of publication                                                                         |
| Country of article focus                                                                       |
| Health and social care personnel involved                                                      |
| Context for change (community, hospital, rehab or residential care)                            |
| Innovation (What did they do or change?)                                                       |
| Social processes (How or why did they do it? Motivations, reasonings, resources, competencies) |
| New ways of working (Outcome)                                                                  |

Supplementary file 3:

**Table S2.** Extraction Table for Retrieved Newspaper Articles (N = 34).

| Title of Article                                                    | <b>"I Have Never Seen Such Devotion to Duty"</b>                                                                                                                                                                                                                                                                                                                                                                                | <b>"It's an Honour to be the One Holding Their Hand"</b>                                                                                                                                                                                                                                                                                                                        | <b>"On the First Day I was Really Worried I Wouldn't Make it"</b>                                       | <b>"The Panic was Huge, but we had to Work as a Team to Give Best Care"</b>                                                                                                                                                                                                                                                                                           |
|---------------------------------------------------------------------|---------------------------------------------------------------------------------------------------------------------------------------------------------------------------------------------------------------------------------------------------------------------------------------------------------------------------------------------------------------------------------------------------------------------------------|---------------------------------------------------------------------------------------------------------------------------------------------------------------------------------------------------------------------------------------------------------------------------------------------------------------------------------------------------------------------------------|---------------------------------------------------------------------------------------------------------|-----------------------------------------------------------------------------------------------------------------------------------------------------------------------------------------------------------------------------------------------------------------------------------------------------------------------------------------------------------------------|
| Source                                                              | South Wales Argus                                                                                                                                                                                                                                                                                                                                                                                                               | Wales Online                                                                                                                                                                                                                                                                                                                                                                    | The Argus                                                                                               | Irish Independent                                                                                                                                                                                                                                                                                                                                                     |
| Byline or Author(s)                                                 | Elizabeth Birt                                                                                                                                                                                                                                                                                                                                                                                                                  | Bethan Thomas                                                                                                                                                                                                                                                                                                                                                                   | Samuel Brooke                                                                                           | Catherine Fegan                                                                                                                                                                                                                                                                                                                                                       |
| Date of publication                                                 | 10.05.20                                                                                                                                                                                                                                                                                                                                                                                                                        | 11.05.20                                                                                                                                                                                                                                                                                                                                                                        | 08.05.20                                                                                                | 29.04.20                                                                                                                                                                                                                                                                                                                                                              |
| Country of publication                                              | Wales                                                                                                                                                                                                                                                                                                                                                                                                                           | Wales                                                                                                                                                                                                                                                                                                                                                                           | England                                                                                                 | Ireland                                                                                                                                                                                                                                                                                                                                                               |
| Country of article focus                                            | Wales                                                                                                                                                                                                                                                                                                                                                                                                                           | Wales                                                                                                                                                                                                                                                                                                                                                                           | England                                                                                                 | Ireland                                                                                                                                                                                                                                                                                                                                                               |
| Health and social care personnel involved                           | HSCPs (porters, domestic staff, ODPs, paramedics, physios, nurses and doctors)                                                                                                                                                                                                                                                                                                                                                  | Carers and nurses                                                                                                                                                                                                                                                                                                                                                               | HSCPs ('cleaners to senior consultants')                                                                | Nursing home staff (physicians, physical therapists, nurses and nursing assistants, social workers and community geriatrician).                                                                                                                                                                                                                                       |
| Context for change (community, hospital, rehab or residential care) | Hospital                                                                                                                                                                                                                                                                                                                                                                                                                        | Residential (nursing home)                                                                                                                                                                                                                                                                                                                                                      | Hospital                                                                                                | Residential (nursing home)                                                                                                                                                                                                                                                                                                                                            |
| Innovation (What did they do or change?)                            | Physical restructuring of space 'white boxes' and reorganisation of communication to reduce patient contact<br>Role expansion esp for cleaning staff—use of PPE, increased workload<br>Regular communication channels established between staff and patient and/or family including doctors ringing pts after discharge to check in, facilitating families to speak with patients and regularly ringing family during admission | Physical reorganisation of space to reduce physical contact 'red isolation zones'<br>Role expansion to work in the 'red zone' areas and increase working hours<br>Sleeping in the care home to limit exposure at home,<br>Nursing staff transfer from hospital to increase capacity<br>Sharing advice and info with other care home managers<br>Social restructuring to be with | Social reorganisation to improve communication and cooperation between staff and with staff and patient | Music on corridors, face-time virtual visits, visits to the gardens to compensate for visitor restrictions<br>Virtual staff meetings using video conferencing<br>Integration of acute system with the community 'public health' system for testing—using hospital staff and resources for swabbing and for the conduction of testing<br>Staff exposed through lack of |

|                                                                                                       |                                                                                                                                                                                                                   |                                                                                                                                                                                                                                                                                                                                            |                                                                                                                                                                                                              |                                                                                                                                                                                                                                                                                                                                                                                                                             |
|-------------------------------------------------------------------------------------------------------|-------------------------------------------------------------------------------------------------------------------------------------------------------------------------------------------------------------------|--------------------------------------------------------------------------------------------------------------------------------------------------------------------------------------------------------------------------------------------------------------------------------------------------------------------------------------------|--------------------------------------------------------------------------------------------------------------------------------------------------------------------------------------------------------------|-----------------------------------------------------------------------------------------------------------------------------------------------------------------------------------------------------------------------------------------------------------------------------------------------------------------------------------------------------------------------------------------------------------------------------|
|                                                                                                       |                                                                                                                                                                                                                   | dying patients and to open up virtual contact with patients and families.                                                                                                                                                                                                                                                                  |                                                                                                                                                                                                              | access to PPE. Hospital staff provided training with regard to PPE<br>Staff encouraged to express concerns during daily ward rounds<br>Team of social workers 'manning phones' to keep contact with families allowing nurses to concentrate on patients (role adaptation and expansion)<br>Staff taking place of families as patients were dying—personalising their care and establishing virtual communication for family |
| <b>Social processes (How or why did they do it? Motivations, reasonings, resources, competencies)</b> | Commitment to their role and willingness to expand it to meet the challenge<br>Recognition of the importance of communication and finding ways to communicate without direct contact (patient notes, phone calls) | Interrelationships between carer/nurse and the patient—'taking the place of family'<br>Commitment to the role—willingness to expand it and take on more hours to meet the challenge<br>Recognition of the importance of social and emotional connection in the absence of physical contact<br>Willingness to share expertise and knowledge | Inter-professional relationships leading to good 'team spirit' rising to the challenge<br>Development of social relationship with patient—regularly 'checking in' to compensate for lack of physical contact | Integration of personnel and services to compensate for acute and community—reimagining 'the team'<br>Role expansion and compensation (social workers and nursing staff)<br>Commitment to social and emotional support for patients in the absence of physical contact                                                                                                                                                      |
| <b>New ways of working (Outcome)</b>                                                                  | Role expansion and improved info sharing/communication                                                                                                                                                            | Role expansion, physical restructuring, social restructuring and improved info sharing/communication                                                                                                                                                                                                                                       | Improved information sharing and communication                                                                                                                                                               | Integration of personnel and services across acute and community<br>Role expansion and inter-                                                                                                                                                                                                                                                                                                                               |

professional compensation  
Social and emotional  
communication

**Table S3.** Extraction Table for Retrieved Newspaper Articles (*N* = 34) cont.

| Title of article                                                           | <b>'Plan the Exit Now? I wouldn't have Time for that'; Emergency Clinics are being Set Up in Several Large Cities...</b>                                                                                                                                                                                                                                           | <b>'We are Working Really Hard as a Care Community'</b>                                                                                                                                                                                                                           | <b>350 iPads to be Delivered to Care Homes and Hospitals Across North Wales...</b>                                                                                                                                                                                                                                                                                 | <b>A day in the Life of a Home Carer in Worcestershire during Coronavirus Pandemic</b>                                                                                                                                                                                                             |
|----------------------------------------------------------------------------|--------------------------------------------------------------------------------------------------------------------------------------------------------------------------------------------------------------------------------------------------------------------------------------------------------------------------------------------------------------------|-----------------------------------------------------------------------------------------------------------------------------------------------------------------------------------------------------------------------------------------------------------------------------------|--------------------------------------------------------------------------------------------------------------------------------------------------------------------------------------------------------------------------------------------------------------------------------------------------------------------------------------------------------------------|----------------------------------------------------------------------------------------------------------------------------------------------------------------------------------------------------------------------------------------------------------------------------------------------------|
| <b>Source</b>                                                              | Die Welt                                                                                                                                                                                                                                                                                                                                                           | Carmarthen Journal                                                                                                                                                                                                                                                                | Denbighshire Free Press                                                                                                                                                                                                                                                                                                                                            | Malvern Gazette                                                                                                                                                                                                                                                                                    |
| <b>Byline or Author(s)</b>                                                 | Nike Heinen                                                                                                                                                                                                                                                                                                                                                        | N/A                                                                                                                                                                                                                                                                               | Arron Evans                                                                                                                                                                                                                                                                                                                                                        | Jemma Bufton                                                                                                                                                                                                                                                                                       |
| <b>Date of publication</b>                                                 | 06.04.20                                                                                                                                                                                                                                                                                                                                                           | 22.04.20                                                                                                                                                                                                                                                                          | 23.04.20                                                                                                                                                                                                                                                                                                                                                           | 17.04.20                                                                                                                                                                                                                                                                                           |
| <b>Country of publication</b>                                              | Germany                                                                                                                                                                                                                                                                                                                                                            | Wales                                                                                                                                                                                                                                                                             | Wales                                                                                                                                                                                                                                                                                                                                                              | England                                                                                                                                                                                                                                                                                            |
| <b>Country of article focus</b>                                            | Germany                                                                                                                                                                                                                                                                                                                                                            | Wales                                                                                                                                                                                                                                                                             | Wales                                                                                                                                                                                                                                                                                                                                                              | England                                                                                                                                                                                                                                                                                            |
| <b>Health and social care personnel involved</b>                           | Doctors, fire department                                                                                                                                                                                                                                                                                                                                           | Doctors, nurses, health care support workers, carers, assistants, transport workers, managers and volunteers                                                                                                                                                                      | GPs and hospital physicans                                                                                                                                                                                                                                                                                                                                         | Carers                                                                                                                                                                                                                                                                                             |
| <b>Context for change (community, hospital, rehab or residential care)</b> | Hospital, residential and community                                                                                                                                                                                                                                                                                                                                | Residential                                                                                                                                                                                                                                                                       | Residential and hospital                                                                                                                                                                                                                                                                                                                                           | Community                                                                                                                                                                                                                                                                                          |
| <b>Innovation (What did they do or change?)</b>                            | Established a 'vulnerable groups taskforce' made up primarily of fire dept employees to inspect nursing homes and run tests on staff,<br>Established isolation areas within nursing homes for residents who are CV positive and 'clearing zones' for new residents who do not have infection<br>Building a field hospital to treat CV positive patients who do not | Hospital physicians collaborating with GPs and community teams to deliver care directly in the home setting<br>Transfer of residents to the acute setting<br>Using technology to maintain contact with district nurses and GPs<br>General practice and community teams across the | Collaboration between local authorities, health board, Macmillan and Wales co-operative center to supply Ipads into residential and community settings enabling: Piloting of a 'Attend Anywhere' project which allows for GPs to deliver a remote consultation service within care homes<br>Isolated patients in care homes and acute settings to communicate with | Expanded role and adaptation to PPE use as well as compensating for increased isolation of clients<br>Some voluntarily providing 24 care to older people in need of support<br>Delivering food parcels as well as inter-organisational support to cover staff shortage in face of increased demand |

|                                                                                                              |                                                                                                                                                                                                                                                                                                                                                                       |                                                                                                                                                                                                                                                                                                                     |                                                                                                                                                                            |                                                                                      |
|--------------------------------------------------------------------------------------------------------------|-----------------------------------------------------------------------------------------------------------------------------------------------------------------------------------------------------------------------------------------------------------------------------------------------------------------------------------------------------------------------|---------------------------------------------------------------------------------------------------------------------------------------------------------------------------------------------------------------------------------------------------------------------------------------------------------------------|----------------------------------------------------------------------------------------------------------------------------------------------------------------------------|--------------------------------------------------------------------------------------|
|                                                                                                              | <p>require intensive care</p> <p>Retired doctors and family doctors unable to practice recruited to run a telephone service</p> <p>Medical students recruited to support an electronic reporting system and for emergency care and patient monitoring</p> <p>Establishing corona teams consisting of physicians who will test and monitor patients in their homes</p> | <p>health boards increasing support to patients in care homes</p> <p>Regular contact from GPs to care homes</p> <p>Social services supporting care homes through financial support, advice and protective equipment</p>                                                                                             | <p>family but also physicians communicating with family too.</p>                                                                                                           |                                                                                      |
| <p><b>Social processes (How or why did they do it? Motivations, reasonings, resources, competencies)</b></p> | <p>Commitment to their role and willingness to expand it to meet the challenge (retirees returning to work and med students working as ancillary).</p> <p>Integration of acute services to the community—touring ‘corona teams</p>                                                                                                                                    | <p>Commitment to their role and willingness to expand it to meet the challenge</p> <p>Integration of care home services with acute settings</p> <p>Greater inter-professional collaboration and support from community care teams (GPs, PHNs) to support care homes</p> <p>Expansion of role of social services</p> | <p>Adapting scope of practice to improve integration of services between community (GP) and residential settings</p> <p>Improved information sharing and communication</p> | <p>Commitment to their role and a willingness to expand it to meet the challenge</p> |
| <p><b>New ways of working (Outcome)</b></p>                                                                  | <p>Integration of acute and community services</p> <p>Role expansion</p>                                                                                                                                                                                                                                                                                              | <p>Expanding scope of practice</p> <p>Integration between acute, community and residential</p>                                                                                                                                                                                                                      |                                                                                                                                                                            | <p>Expansion of scope of practice and inter-organisational support.</p>              |

**Table s4.** Extraction Table for Retrieved Newspaper Articles (*N* = 34) cont.

| Title of article                                                           | <b>‘A lot of People have Stepped Up and are Working Long Hours’; Adult Social Care Director Hails...</b> | <b>Care Home Workers’ Week-Long Live-Ins with Residents</b>                                                                                                                                                                                                                                          | <b>Bucks-Based Home Care Go ‘above and beyond’ for Clients and Employees</b>                                                                                                                                                                                                                                                                                                                                           | <b>Care Home Workers on Battle they Face to Keep Residents Safe</b>                                                                                                |
|----------------------------------------------------------------------------|----------------------------------------------------------------------------------------------------------|------------------------------------------------------------------------------------------------------------------------------------------------------------------------------------------------------------------------------------------------------------------------------------------------------|------------------------------------------------------------------------------------------------------------------------------------------------------------------------------------------------------------------------------------------------------------------------------------------------------------------------------------------------------------------------------------------------------------------------|--------------------------------------------------------------------------------------------------------------------------------------------------------------------|
| <b>Source</b>                                                              | Stoke The Sentinel                                                                                       | Eastern Daily Press                                                                                                                                                                                                                                                                                  | Bucks Free Press                                                                                                                                                                                                                                                                                                                                                                                                       | Grimsby Telegraph                                                                                                                                                  |
| <b>Byline or Author(s)</b>                                                 | Kathie Mcinne                                                                                            | N/A                                                                                                                                                                                                                                                                                                  | Kiera Gillies                                                                                                                                                                                                                                                                                                                                                                                                          | Peter Craig                                                                                                                                                        |
| <b>Date of publication</b>                                                 | 15.04.20                                                                                                 | 15.04.20                                                                                                                                                                                                                                                                                             | 11.05.20                                                                                                                                                                                                                                                                                                                                                                                                               | 15.04.20                                                                                                                                                           |
| <b>Country of publication</b>                                              | England                                                                                                  | England                                                                                                                                                                                                                                                                                              | England                                                                                                                                                                                                                                                                                                                                                                                                                | England                                                                                                                                                            |
| <b>Country of article focus</b>                                            | England                                                                                                  | England                                                                                                                                                                                                                                                                                              | England                                                                                                                                                                                                                                                                                                                                                                                                                | England                                                                                                                                                            |
| <b>Health and social care personnel involved</b>                           | Doctors, carers                                                                                          | Residential care staff                                                                                                                                                                                                                                                                               | Home Carers                                                                                                                                                                                                                                                                                                                                                                                                            | Home carers                                                                                                                                                        |
| <b>Context for change (community, hospital, rehab or residential care)</b> | Community                                                                                                | Residential                                                                                                                                                                                                                                                                                          | Community                                                                                                                                                                                                                                                                                                                                                                                                              | Community                                                                                                                                                          |
| <b>Innovation (What did they do or change?)</b>                            | Council staff redeployed into home carer roles—many of home are retraining to do the role                | Week on week off living in the care home to prevent spread of virus (working in teams)<br>Expanding their scope of practice to cover ancillary services which have been withdrawn from the home (hairdressing, entertainment)<br>Using virtual tech to maintain contact between residents and family | Virtual meetings every week to deliver training and motivational talks from experts including:<br>Advice from a home economist on diet and meal planning<br>Podiatrists sharing videos and expertise to assist carers in footcare<br>Yoga classes<br>Ongoing support for carers through telephone calls and motivational speakers<br>Closed facebook group for carers to share photos and activities<br>An online care | Increased their role to include shopping, collecting medication and ensuring all of the needs of their clients (older people) are met during isolation from family |

|                                                                                                       |                                                                                                                                                                                                              |                                               |                                                                                                                                                                                                                                                                                                                     |                                                                                            |
|-------------------------------------------------------------------------------------------------------|--------------------------------------------------------------------------------------------------------------------------------------------------------------------------------------------------------------|-----------------------------------------------|---------------------------------------------------------------------------------------------------------------------------------------------------------------------------------------------------------------------------------------------------------------------------------------------------------------------|--------------------------------------------------------------------------------------------|
| <b>Social processes (How or why did they do it? Motivations, reasonings, resources, competencies)</b> | Volunteering to be redeployed into carer role because that was where the challenge was—to support vulnerable people (esp older people) in the community and to transition people out of acute care settings. | Commitment to their role and to the residents | monitoring system to provide oversight of quality and safety of care<br>Role expansion (nutrition and podiatry)<br>Online virtual community support for carers with a view to improving care quality<br>Role expansion and commitment<br>Establishing a virtual community to provide support and skills acquisition | Commitment to their job and to their clients results in willingness to go above and beyond |
| <b>New ways of working (Outcome)</b>                                                                  | Role expansion and redeployment                                                                                                                                                                              | Role expansion                                |                                                                                                                                                                                                                                                                                                                     | Expanded role                                                                              |

**Table S5.** Extraction Table for Retrieved Newspaper Articles (*N* = 34) cont.

| Title of Article                                                           | Elderly in Transfer to Udston Hospital                                                                                                             | Front Line Lives: Care Home Staff on Working through Covid-19                                                                                                                                                                                                                                                                                               | Health and Social Care Coronavirus Pledge Given by NHS and North Lanarkshire Council; Working Whenever Possible as a Single Organisation, the Approach will be to Deliver and Manage many Health and Social Care Services Across Lanarkshire. | Heroes of Home Front                                                                                                                                                 |
|----------------------------------------------------------------------------|----------------------------------------------------------------------------------------------------------------------------------------------------|-------------------------------------------------------------------------------------------------------------------------------------------------------------------------------------------------------------------------------------------------------------------------------------------------------------------------------------------------------------|-----------------------------------------------------------------------------------------------------------------------------------------------------------------------------------------------------------------------------------------------|----------------------------------------------------------------------------------------------------------------------------------------------------------------------|
| <b>Source</b>                                                              | Winshaw Press                                                                                                                                      | The National                                                                                                                                                                                                                                                                                                                                                | Daily Record                                                                                                                                                                                                                                  | The Sun (UK)                                                                                                                                                         |
| <b>Byline or Author(s)</b>                                                 | N/A                                                                                                                                                | Karrin Goodwin                                                                                                                                                                                                                                                                                                                                              | Ross Thomson                                                                                                                                                                                                                                  | Lorraine Kelly                                                                                                                                                       |
| <b>Date of publication</b>                                                 | 08.05.20                                                                                                                                           | 10.05.20                                                                                                                                                                                                                                                                                                                                                    | 18.03.20                                                                                                                                                                                                                                      | 4.04.20                                                                                                                                                              |
| <b>Country of publication</b>                                              | Scotland                                                                                                                                           | Scotland                                                                                                                                                                                                                                                                                                                                                    | England                                                                                                                                                                                                                                       | England                                                                                                                                                              |
| <b>Country of article focus</b>                                            | Scotland                                                                                                                                           | Scotland                                                                                                                                                                                                                                                                                                                                                    | England                                                                                                                                                                                                                                       | England                                                                                                                                                              |
| <b>Health and social care personnel involved</b>                           | Consultant Geriatrician, allied health professionals, doctors, nurses                                                                              | Social Carers workers (home carers, first responders, care home)                                                                                                                                                                                                                                                                                            | Social care and council workers.                                                                                                                                                                                                              | Nursing home staff                                                                                                                                                   |
| <b>Context for change (community, hospital, rehab or residential care)</b> | Hospital                                                                                                                                           | Residential & Community                                                                                                                                                                                                                                                                                                                                     | Community                                                                                                                                                                                                                                     | Residential (nursing home)                                                                                                                                           |
| <b>Innovation (What did they do or change?)</b>                            | Reconfiguration in the care of older people moving ward out of acute hospital to a new setting. Maintained same providing seven days clinical team | Reviewing information and guidance quickly for implementation in their daily work.<br>Taking on new roles— ‘fulfilling the role of district nurses’<br>Checking in on older people who previously received home care visits in their own time.<br>In residential setting celebrating birthdays and bringing residents outside to the garden during Covid19. | Three council social care staff working together to reorganise supports for older people<br>Improve communication and cooperation between staff.                                                                                              | Staff taking place of families personalising their care and establishing virtual communication for family. Staff moving into the nursing home to care for residents. |

|                                                                                                       |                                                                                               |                                                                                                                 |                                                                                        |                                                                                            |
|-------------------------------------------------------------------------------------------------------|-----------------------------------------------------------------------------------------------|-----------------------------------------------------------------------------------------------------------------|----------------------------------------------------------------------------------------|--------------------------------------------------------------------------------------------|
| <b>Social processes (How or why did they do it? Motivations, reasonings, resources, competencies)</b> | Commitment to their role and willingness to adapt it to provide ongoing care to older people. | Role expansion<br>Commitment of emotional support for patients.                                                 | Inter-professional relationships leading to good 'team spirit' rising to the challenge | Role expansion and compensation<br>Commitment to social and emotional support for patients |
| <b>New ways of working (Outcome)</b>                                                                  | Physical restructuring                                                                        | Role expansion<br>Learning and implementing guidance on new ways of working. Social and emotional communication | Improved information sharing and communication                                         | Role expansion<br>Social and emotional communication                                       |

**Table S6.** Extraction Table for Retrieved Newspaper Articles (*N* = 34) cont.

| <b>Title of article</b>                                                    | <b>Heroes of the Corona Crisis</b>                                                           | <b>Heroic Staff to go into 24/7 Quarantine for a MONTH with OAPs</b>                           | <b>How are our Pharmacists Coping with Covid Crisis?; The Coronavirus has Transformed the Way Chemists are Working. Here they Speak about how they, their Staff and their Customers are Dealing with the New Situation</b> | <b>How Work has Changed for Carers during Health Crisis</b>                                                 |
|----------------------------------------------------------------------------|----------------------------------------------------------------------------------------------|------------------------------------------------------------------------------------------------|----------------------------------------------------------------------------------------------------------------------------------------------------------------------------------------------------------------------------|-------------------------------------------------------------------------------------------------------------|
| <b>Source</b>                                                              | Scottish Daily Mail                                                                          | Scottish Daily Mail                                                                            | Irish Times                                                                                                                                                                                                                | South Wales Echo                                                                                            |
| <b>Byline or Author(s)</b>                                                 | NA                                                                                           | Katherine Sutherland                                                                           | Danielle Barron                                                                                                                                                                                                            | Richard Youle                                                                                               |
| <b>Date of publication</b>                                                 | 14.04.20                                                                                     | 12/4/2020                                                                                      | 21.04.20                                                                                                                                                                                                                   | 18.04.20                                                                                                    |
| <b>Country of publication</b>                                              | Scotland                                                                                     | Scotland                                                                                       | Ireland                                                                                                                                                                                                                    | Wales                                                                                                       |
| <b>Country of article focus</b>                                            | Scotland                                                                                     | Scotland                                                                                       | Ireland                                                                                                                                                                                                                    | Wales                                                                                                       |
| <b>Health and social care personnel involved</b>                           | Healthcare teams                                                                             | Staff in a care home (chefs, assistants nurses, manager)                                       | Community Pharmacists & GP'S                                                                                                                                                                                               | Experience of formal carers                                                                                 |
| <b>Context for change (community, hospital, rehab or residential care)</b> | Hospital                                                                                     | Residential (nursing home)                                                                     | Community                                                                                                                                                                                                                  | Community & Residential setting                                                                             |
| <b>Innovation (What did they do or change?)</b>                            | Taking on new roles-e.g. consultant plastic surgeon took the role of a nurse in an ICU unit. | Activities such as baking art and singalongs organised to compensate for visitor restrictions. | Reorganisation of services to provide care to older patients.<br>Arranging deliveries of prescriptions for some older people who are                                                                                       | Taking on new information around PPE and adapting her work due to Covid 19.<br>Staff personalising the care |

|                                                                                                       |                                                                                                                                                                                      |                                                                                                                                                                                                                                                                                                                                                                                                                                                              |                                                                                                        |                                                                           |
|-------------------------------------------------------------------------------------------------------|--------------------------------------------------------------------------------------------------------------------------------------------------------------------------------------|--------------------------------------------------------------------------------------------------------------------------------------------------------------------------------------------------------------------------------------------------------------------------------------------------------------------------------------------------------------------------------------------------------------------------------------------------------------|--------------------------------------------------------------------------------------------------------|---------------------------------------------------------------------------|
|                                                                                                       | Regular communication, briefings and teamwork between disciplines                                                                                                                    | Staff created a space outside and a booking system for family residents to visit residents safely.<br>Sleeping in the care home to limit exposure at home.<br>Interrelationships between carer/nurse and the patient — ‘taking the place of family’<br>Commitment to the role — willingness to expand it and take on more hours to meet the challenge<br>Recognition of the importance of social and emotional connection in the absence of physical contact | cocooning.<br>Accepting electronic prescriptions from GP’s via one system (previously paper based).    | of residents doing hair and nails of residents to keep spirits up.        |
| <b>Social processes (How or why did they do it? Motivations, reasonings, resources, competencies)</b> | Commitment to their role and willingness to expand it to meet the challenge<br>Recognition of the importance of communication and finding ways to communicate and share information. | Role expansion<br>Social and emotional communication<br>Physical restructuring                                                                                                                                                                                                                                                                                                                                                                               | Inter-professional relationships<br>Using technology to improve information sharing and communication. | Role expansion<br>Commitment to social and emotional support for patients |
| <b>New ways of working (Outcome)</b>                                                                  | Role expansion and improved info sharing/communication                                                                                                                               |                                                                                                                                                                                                                                                                                                                                                                                                                                                              | Improved information sharing and communication.<br>Role expansion.                                     | Role expansion<br>Social and emotional communication                      |

**Table S7.** Extraction Table for Retrieved Newspaper Articles (*N* = 34) cont.

|                                                                            |                                                                                                                                                                                                          |                                                                                                                                                                                                                                                                  |                                                                                                                                                                                                                |                                                                                                                                                                                                                                                                      |
|----------------------------------------------------------------------------|----------------------------------------------------------------------------------------------------------------------------------------------------------------------------------------------------------|------------------------------------------------------------------------------------------------------------------------------------------------------------------------------------------------------------------------------------------------------------------|----------------------------------------------------------------------------------------------------------------------------------------------------------------------------------------------------------------|----------------------------------------------------------------------------------------------------------------------------------------------------------------------------------------------------------------------------------------------------------------------|
| <b>Title of article</b>                                                    | Inside the Mater's war on Covid-19; If the beds run out, we'll drop special medical pods in the car park, hospital chief executive Alan Sharp tells Maeve Sheehan                                        | Medicine and food parcels are on the way                                                                                                                                                                                                                         | Meet and greet service when leaving hospital; Door-to-door taxis for vulnerable patients                                                                                                                       | Meet NHS staff using skills to help in frontline: they've stepped away from current roles                                                                                                                                                                            |
| <b>Source</b>                                                              | Sunday Independent                                                                                                                                                                                       | Paisley Daily Express                                                                                                                                                                                                                                            | Stoke the Sentinel                                                                                                                                                                                             | Leicester Mercury                                                                                                                                                                                                                                                    |
| <b>Byline or Author(s)</b>                                                 | Maeve Sheehan                                                                                                                                                                                            | Steph Brawn                                                                                                                                                                                                                                                      | Kathie McInnes                                                                                                                                                                                                 | Staff reporter                                                                                                                                                                                                                                                       |
| <b>Date of publication</b>                                                 | 22.03.20                                                                                                                                                                                                 | 4/4/2020                                                                                                                                                                                                                                                         | 09.05.20                                                                                                                                                                                                       | 01.05.20                                                                                                                                                                                                                                                             |
| <b>Country of publication</b>                                              | Ireland                                                                                                                                                                                                  | Scotland                                                                                                                                                                                                                                                         | England                                                                                                                                                                                                        | England                                                                                                                                                                                                                                                              |
| <b>Country of article focus</b>                                            | Ireland                                                                                                                                                                                                  | Scotland                                                                                                                                                                                                                                                         | England                                                                                                                                                                                                        | England                                                                                                                                                                                                                                                              |
| <b>Health and social care personnel involved</b>                           | HSCP's (including CEO)                                                                                                                                                                                   | Health and social care                                                                                                                                                                                                                                           | Health and social care                                                                                                                                                                                         | Nurses                                                                                                                                                                                                                                                               |
| <b>Context for change (community, hospital, rehab or residential care)</b> | Hospital and community                                                                                                                                                                                   | Community                                                                                                                                                                                                                                                        | Hospital to home                                                                                                                                                                                               | Statutory bodies (NHS England and NHS Improvement) and hospitals                                                                                                                                                                                                     |
| <b>Innovation (What did they do or change?)</b>                            | Taking on new roles within the acute hospital.<br>Regular communication, briefings with partners in step down hospitals ensuring older people were transferred.<br>Sharing advice and info across sites. | Taking on new roles-developed a medicine delivery service for older people in the community.<br>Role expansion for teams in other areas in the council doing welfare and food parcel deliveries for older people.<br>Sharing advice and info across the council. | Taking on new roles-developed a transport from hospital to home system with local taxi companies for older people.<br>Provided ongoing welfare checks.<br>Increased social care supports to seven days a week. | Voluntary redeployment of nurses working in senior managerial/strategic roles in NHS England and NHS Improvement to support front-line teams working in hospitals<br>Transfer from head office to increase capacity on front line and share expertise and knowledge. |
| <b>Social processes (How or why did they do it? Motivations,</b>           | Commitment to their role and willingness to expand it to meet the challenge<br>Recognition of the importance of                                                                                          | Interrelationships between council staff.<br>Commitment to the role—willingness to expand it and take                                                                                                                                                            | Inter-professional relationships leading to good 'team spirit' rising to the challenge                                                                                                                         | Recognition that hospitals required additional resources and expertise<br>Knowledge sharing—bringing skills and expertise with them to assist                                                                                                                        |

|                                             |                                                                      |                                                                                     |                                                                                         |                                                                                                                                                                                                                                                                                                                                         |
|---------------------------------------------|----------------------------------------------------------------------|-------------------------------------------------------------------------------------|-----------------------------------------------------------------------------------------|-----------------------------------------------------------------------------------------------------------------------------------------------------------------------------------------------------------------------------------------------------------------------------------------------------------------------------------------|
| <b>reasonings, resources, competencies)</b> | communication and finding ways to communicate and share information. | on more hours to meet the challenge<br>Willingness to share expertise and knowledge | Development of social relationship with older people - regularly 'checking in' on them. | hospital staff.<br>Willingness to share knowledge/expertise<br>Communication<br>Commitment to working with colleagues in hospitals to ensure patients receive the care that they need during C-19 pandemic<br>Willingness— role change / role expansion / expanded scope of practice.<br>Adaptability, flexibility to take on new roles |
| <b>New ways of working (Outcome)</b>        | Role expansion and improved info sharing/communication               | Role expansion, social restructuring and improved info sharing/communication        | Role expansion<br>Improved info sharing and communication                               | Reorganisation of human resources across organisations<br>New knowledge sharing<br>Flexibility in scope of practice.                                                                                                                                                                                                                    |

**Table S8.** Extraction Table for Retrieved Newspaper Articles (*N* = 34) cont.

| Title of article                                                    | Undervalued care workers continue to show just how vital they are in fight against coronavirus; Hard working and selfless carers are unsung heroes of this crisis | These elderly people are so vulnerable—it's our job to look after them; with the Grand National cancelled, the ECHO has launched You Bet We Care, to encourage readers to donate their stake to Liverpool City Region Metro Mayor Steve Rotheram's £1m fundraising campaign—IRC Cares. Here's an example of how the cash could be used | Picture of Selflessness                                                                                           | MP praise for coronavirus lifeline                                                                                                                    |
|---------------------------------------------------------------------|-------------------------------------------------------------------------------------------------------------------------------------------------------------------|----------------------------------------------------------------------------------------------------------------------------------------------------------------------------------------------------------------------------------------------------------------------------------------------------------------------------------------|-------------------------------------------------------------------------------------------------------------------|-------------------------------------------------------------------------------------------------------------------------------------------------------|
|                                                                     |                                                                                                                                                                   |                                                                                                                                                                                                                                                                                                                                        |                                                                                                                   |                                                                                                                                                       |
| Source                                                              | Liverpool Echo                                                                                                                                                    | Liverpool Echo                                                                                                                                                                                                                                                                                                                         | Daily Mail (London)                                                                                               | Ayr Advertiser                                                                                                                                        |
| Byline or Author(s)                                                 | Jenny Kirkham                                                                                                                                                     | Cheryl Mullin                                                                                                                                                                                                                                                                                                                          | Helen Weathers                                                                                                    | Ryan Thorn                                                                                                                                            |
| Date of publication                                                 | 13.04.20                                                                                                                                                          | 02 04 20                                                                                                                                                                                                                                                                                                                               | 04.04.20                                                                                                          | 09.04.20                                                                                                                                              |
| Country of publication                                              | England                                                                                                                                                           | England                                                                                                                                                                                                                                                                                                                                | England                                                                                                           | Scotland                                                                                                                                              |
| Country of article focus                                            | England                                                                                                                                                           | England                                                                                                                                                                                                                                                                                                                                | England                                                                                                           | Scotland                                                                                                                                              |
| Health and social care personnel involved                           | HSCPs (carers)                                                                                                                                                    | Age Action staff and community volunteers                                                                                                                                                                                                                                                                                              | HSCPs (carers, chef and kitchen and domestic assistants) and deputy manager                                       | Staff and volunteers at South Ayrshire Lifeline (a caring call centre set up by Voluntary South Ayrshire (VASA))                                      |
| Context for change (community, hospital, rehab or residential care) | Community (nursing home)                                                                                                                                          | Community (people living at home)                                                                                                                                                                                                                                                                                                      | Residential (nursing home)                                                                                        | Community (people living at home)                                                                                                                     |
| Innovation (What did they do or change?)                            | Care staff sleeping in the care home to limit risk of exposure to the residents                                                                                   | Collaboration between Age Action and community volunteers to provide additional supports to older people (cocooning) in the community:<br>Financial assistance<br>Food packages distribution<br>Prescription collection<br>Well-being calls to assess level of need and                                                                | Staff sleeping in the care home to limit exposure to the residents<br>Working longer hours without additional pay | Call centre collaboration with volunteers to provide additional assistance to older persons in the community:<br>Wellbeing calls to provide emotional |

|                                                                                                                               |                                                                                                                                                                                                              |                                                                                                                                                                                                                                                                                                                                                   |                                                                                                                                                                                                                                   |                                                                                                                                                                                                                                                                                                                                                                      |
|-------------------------------------------------------------------------------------------------------------------------------|--------------------------------------------------------------------------------------------------------------------------------------------------------------------------------------------------------------|---------------------------------------------------------------------------------------------------------------------------------------------------------------------------------------------------------------------------------------------------------------------------------------------------------------------------------------------------|-----------------------------------------------------------------------------------------------------------------------------------------------------------------------------------------------------------------------------------|----------------------------------------------------------------------------------------------------------------------------------------------------------------------------------------------------------------------------------------------------------------------------------------------------------------------------------------------------------------------|
|                                                                                                                               |                                                                                                                                                                                                              | regular check-in calls, if needed.<br>New team working—Age Action matching<br>volunteer to older person in need.                                                                                                                                                                                                                                  |                                                                                                                                                                                                                                   | support (listening ear)<br>Food deliveries,<br>Prescription collection<br>support for people with<br>sight or hearing<br>impairment and hearing<br>aid batteries by post<br>New team working—call<br>centre and volunteers<br>Recognition of the<br>emotional and physical<br>needs of older people<br>who don't have other<br>means of support during<br>cocooning. |
| <b>Social processes<br/>(How or why did<br/>they do it?<br/>Motivations,<br/>reasonings,<br/>resources,<br/>competencies)</b> | Dedication/commitment to role—<br>flexibility/adaptability to change to<br>meet the challenge.<br>Restructuring working hours—<br>carers sleeping on premises<br>Willingness to change working<br>conditions | Recognition of the emotional and physical<br>needs of older people who may not have<br>other means of support during cocooning.<br>New team work—Age Action and<br>community volunteers working together to<br>provide support to older people.<br>Communication and information sharing<br>Developing social relationships with older<br>persons | Dedication/commitment to —<br>flexibility/adaptability<br>willingness to take on longer<br>hours to protect residents<br>Restructure working hours—<br>carers sleeping on premises<br>Willingness to change working<br>conditions | New team work—<br>between call centre staff<br>and volunteers to<br>provide support to older<br>people.<br>Communication and<br>information sharing<br>Developing social<br>relationships with older<br>persons<br>Role expansion                                                                                                                                    |
| <b>New ways of<br/>working (Outcome)</b>                                                                                      | Role—restructuring of working<br>hours<br>Change of working conditions                                                                                                                                       | Role expansion<br>New ways of working—new team formation<br>/ working beyond normal team boundary                                                                                                                                                                                                                                                 | Role—restructuring of working<br>hours<br>Change in working conditions                                                                                                                                                            | New ways of working—<br>new team formation /<br>working beyond normal<br>team boundary                                                                                                                                                                                                                                                                               |

**Table S9.** Extraction Table for Retrieved Newspaper Articles (*N* = 34) cont.

| Title of article                                                           | <b>“Step up to the Mark”: Council Transforms Social Care Services to Look after the Elderly</b>                                                                                                                                                                                                                                                                                                                                                                                                                                                             | <b>Pulling Together to Help the Frontline</b>                                                                                                                                                                                                                                                                              | <b>We’re all in this together. Links between Private and Public Healthcare Forged in the Pandemic will Live on, says Spire Chief Justin Ash</b>                                                                                                                                                                                                                        | <b>New Covid-19 Rehabilitation Hospital to open in former TB Wards</b>                                                                                                                                                                                                                                                                                                    |
|----------------------------------------------------------------------------|-------------------------------------------------------------------------------------------------------------------------------------------------------------------------------------------------------------------------------------------------------------------------------------------------------------------------------------------------------------------------------------------------------------------------------------------------------------------------------------------------------------------------------------------------------------|----------------------------------------------------------------------------------------------------------------------------------------------------------------------------------------------------------------------------------------------------------------------------------------------------------------------------|------------------------------------------------------------------------------------------------------------------------------------------------------------------------------------------------------------------------------------------------------------------------------------------------------------------------------------------------------------------------|---------------------------------------------------------------------------------------------------------------------------------------------------------------------------------------------------------------------------------------------------------------------------------------------------------------------------------------------------------------------------|
| <b>Source</b>                                                              | Craven Herald                                                                                                                                                                                                                                                                                                                                                                                                                                                                                                                                               | South Wales Echo                                                                                                                                                                                                                                                                                                           | The Sunday Times (London)                                                                                                                                                                                                                                                                                                                                              | Sunday Independent                                                                                                                                                                                                                                                                                                                                                        |
| <b>Byline or Author(s)</b>                                                 | Herald reporter                                                                                                                                                                                                                                                                                                                                                                                                                                                                                                                                             | Aamir Mohammed                                                                                                                                                                                                                                                                                                             | Sabah Meddings                                                                                                                                                                                                                                                                                                                                                         | Maeve Sheehan                                                                                                                                                                                                                                                                                                                                                             |
| <b>Date of publication</b>                                                 | 10.4.2020                                                                                                                                                                                                                                                                                                                                                                                                                                                                                                                                                   | 20.04.20                                                                                                                                                                                                                                                                                                                   | 10.05.20                                                                                                                                                                                                                                                                                                                                                               | 03.05.20                                                                                                                                                                                                                                                                                                                                                                  |
| <b>Country of publication</b>                                              | England                                                                                                                                                                                                                                                                                                                                                                                                                                                                                                                                                     | Wales                                                                                                                                                                                                                                                                                                                      | England                                                                                                                                                                                                                                                                                                                                                                | Ireland                                                                                                                                                                                                                                                                                                                                                                   |
| <b>Country of article focus</b>                                            | England                                                                                                                                                                                                                                                                                                                                                                                                                                                                                                                                                     | Wales                                                                                                                                                                                                                                                                                                                      | England                                                                                                                                                                                                                                                                                                                                                                | Ireland                                                                                                                                                                                                                                                                                                                                                                   |
| <b>Health and social care personnel involved</b>                           | Front line social care teams (inc carers), hospital doctors, GPs, local authority staff, community health staff                                                                                                                                                                                                                                                                                                                                                                                                                                             | Frontline health workers—hospital and community<br>Community volunteers<br>Hospital and community                                                                                                                                                                                                                          | Doctors and nurses                                                                                                                                                                                                                                                                                                                                                     | Geriatrician, staff of nursing home, hospital staff and IEHG staff                                                                                                                                                                                                                                                                                                        |
| <b>Context for change (community, hospital, rehab or residential care)</b> | Hospital, community (nursing homes) (homes of older people)                                                                                                                                                                                                                                                                                                                                                                                                                                                                                                 | (primary care, nursing homes, palliative care and people’s homes)                                                                                                                                                                                                                                                          | Private and NHS hospitals                                                                                                                                                                                                                                                                                                                                              | Hospital and community (nursing home)                                                                                                                                                                                                                                                                                                                                     |
| <b>Innovation (What did they do or change?)</b>                            | Council transformed its social care service to improve capacity of NHS in preparation of coronavirus peak.<br>Front line social care team (council employees), some whom redeployed, worked with hospital staff to expedite discharge of older people from hospital to appropriate community setting (nursing home or their own home)<br>Front line social care team (council) extended hours of service in community (to 7 days 8 am-8pm) and work with primary health care (GPs and other community staff) to provide emergency support and treatment for | Community fundraising for provision of PPE to GP practices, nursing homes and palliative care services, and respirators for local ICU.<br>GP consultations changed to phone and video consultations. Ace to -face consultations only if necessary.<br>Redeployment of orthopedic surgeons in hospital to assist in care of | New contractual relationship between NHS and private healthcare group to increase capacity (additional ICU beds) and continue treatment for patients requiring elective surgery, treatment of cancer patients and midwifery services.<br>Redeployment of NHS doctors and nurses to private hospitals to provide services alongside those employed by private hospitals | Transformed former TB unit on site of nursing home to a rehabilitation post-covid ward for people of all ages<br>Transfer of staff from hospital to work on new ward and work in nursing home (re latter to compensate for shortages of staff due to covid)<br>Integration of laboratory medicine into nursing home setting—hospital lab resources used for testing staff |

|                                                                                                               |                                                                                                                                                                                                                                                                                                                                                                                                                                                                                                                                                                                                                                                                                                                                                                                                                                                                                                                            |                                                                                                                                                                                                                                                                                                                                                                                                                                                                                                                                                                                                                                    |                                                                                                                                                                                                                                                                                                                                                                                                                                                                                                                                               |                                                                                                                                                                                                                                                                                                                                                                                                                                                                                                                                                                                                                                          |
|---------------------------------------------------------------------------------------------------------------|----------------------------------------------------------------------------------------------------------------------------------------------------------------------------------------------------------------------------------------------------------------------------------------------------------------------------------------------------------------------------------------------------------------------------------------------------------------------------------------------------------------------------------------------------------------------------------------------------------------------------------------------------------------------------------------------------------------------------------------------------------------------------------------------------------------------------------------------------------------------------------------------------------------------------|------------------------------------------------------------------------------------------------------------------------------------------------------------------------------------------------------------------------------------------------------------------------------------------------------------------------------------------------------------------------------------------------------------------------------------------------------------------------------------------------------------------------------------------------------------------------------------------------------------------------------------|-----------------------------------------------------------------------------------------------------------------------------------------------------------------------------------------------------------------------------------------------------------------------------------------------------------------------------------------------------------------------------------------------------------------------------------------------------------------------------------------------------------------------------------------------|------------------------------------------------------------------------------------------------------------------------------------------------------------------------------------------------------------------------------------------------------------------------------------------------------------------------------------------------------------------------------------------------------------------------------------------------------------------------------------------------------------------------------------------------------------------------------------------------------------------------------------------|
| <b>Social processes<br/>(How or why did they do it?<br/>Motivations, reasonings, resources, competencies)</b> | community based people with covid, (No reference to age)<br>Council working with nursing homes to provide support and guidance—including introduction of segregated areas in nursing homes.                                                                                                                                                                                                                                                                                                                                                                                                                                                                                                                                                                                                                                                                                                                                | covid patients.<br>Segregation of covid and non-covid patients in hospital by introduction of separate zones.                                                                                                                                                                                                                                                                                                                                                                                                                                                                                                                      |                                                                                                                                                                                                                                                                                                                                                                                                                                                                                                                                               | and residents at nursing home to identify covid and improve risk management.<br>Integration of other hospital services (non specified) with nursing home—residents given greater access to services.                                                                                                                                                                                                                                                                                                                                                                                                                                     |
|                                                                                                               | Willingness to extend role (scope of practice); willingness to take on new role.<br>Increased integration between hospital and council employees (front-line) in respect of discharging patients. Working beyond normal team boundaries.<br>Increased communication and information sharing.<br>Recognition of additional capacity required by NHS hospitals to treat covid patients.<br>Willingness to work longer hours—dedication/commitment to role<br>Willingness to work outside normal team boundary in the community<br>Increased teamwork, communication and information sharing.<br>Willingness to share expertise and knowledge with nursing homes.<br>Willingness of nursing home to adapt to new physical infrastructure and to adapt to advice provided for mitigation of risk of contagion to residents and staff<br>Knowledge sharing<br>Restructuring physical infrastructure to provide segregated zones | Fundraising: Recognition of need to reduce risk to frontline workers and patients. Willingness to fundraise.<br>GP service—recognition of need to reduce risk of transmission of virus. Use of technology for consultations -adapting pathway of care.<br>New means of communication.<br>Face-to-face consultations where necessary.<br>Willingness to change systems of work.<br>Orthopedic surgeon redeployment—recognition of need to maximise available resources.<br>Willingness to work in different team / specialty.<br>Role expansion, role change.<br>Recognition that risk management requires minimal exposure by non- | Ensuring sufficient capacity in health service to treat covid-19 patients<br>Recognition of importance of continuing regular services—ensuring elective surgery, cancer treatment and midwifery care can continue<br>Reorganisation—transfer of some services to new location and transfer of staff<br>Redeployment of NHS doctors and nurses—willingness to work in new physical environment, willingness to adapt during crisis, willingness to work in new team.<br>Partnership approach between NHS and private health care organisation. | Integration of services across hospital, temporary ward and nursing home<br>Diagnostic test—may reduce isolation period and increase capacity of workforce.<br>Increased collaboration between nursing home, hospital and IEHG.<br>Transfer of staff from hospital setting<br>Recognition of need for additional capacity to treat covid rehab patients and recognition of need to compensate for acute staff shortages due to covid at nursing home.<br>Role expansion—willingness to work across different ornaitions<br>Willingness to work beyond normal team boundary<br>Willingness to work in new physical settings and new teams |

|                                      |                                                                                                                                                                                                                                                                          |                                                                                                                                                                                                                                                             |                                                                                                                                                                                                                                                                                                                                                            |
|--------------------------------------|--------------------------------------------------------------------------------------------------------------------------------------------------------------------------------------------------------------------------------------------------------------------------|-------------------------------------------------------------------------------------------------------------------------------------------------------------------------------------------------------------------------------------------------------------|------------------------------------------------------------------------------------------------------------------------------------------------------------------------------------------------------------------------------------------------------------------------------------------------------------------------------------------------------------|
|                                      |                                                                                                                                                                                                                                                                          | <p>covid patients to those with covid. Willingness to change physical infrastructure.</p> <p>Forward planning, communication, staff adapting to new ways of working.</p> <p>Willingness to change pathways / re-assign physical spaces within hospital.</p> |                                                                                                                                                                                                                                                                                                                                                            |
| <b>New ways of working (Outcome)</b> | <p>Increased integrated care across hospital and community boundary and within the community</p> <p>Reorganisation of services to meet challenge (working conditions and working in extended teams)</p> <p>Reorganisation of physical infrastructure (nursing homes)</p> | <p>Adapted pathways of care</p> <p>New ways of communication with patients.</p> <p>Role expansion</p> <p>Working outside of normal team boundary, working within new teams</p>                                                                              | <p>Physical reorganisation of services—transfer of services to the private sector</p> <p>Reorganisation of staff—transfer of staff to new location</p> <p>Patients cared for in private hospital, care funded by NHS and provided by mix of NHS and private hospitals staff.</p> <p>Public and private partnership sharing NHS human resources (staff)</p> |

**Table S10.** Extraction Table for Retrieved Newspaper Articles (*N* = 34) cont.

| Title of Article                                                                                      | <b>“We haven’t had time to grieve” Care Homes Struggle as Covid-19 Deaths Rise. UK’s Largest Provider Says 10% of All Staff are Self-Isolating as Lack of PPE Testing takes Toll across the Sector</b> | <b>Team Effort gets Tablet Computers to most Vulnerable</b>                                                           |
|-------------------------------------------------------------------------------------------------------|--------------------------------------------------------------------------------------------------------------------------------------------------------------------------------------------------------|-----------------------------------------------------------------------------------------------------------------------|
| Source                                                                                                | The Guardian (London)                                                                                                                                                                                  | Wirral Globe                                                                                                          |
| Byline or Author(s)                                                                                   | Robert Booth Social Affairs Correspondent                                                                                                                                                              | George Morgan                                                                                                         |
| Date of publication                                                                                   | 09.04.20                                                                                                                                                                                               | 01.05.20                                                                                                              |
| Country of publication                                                                                | England                                                                                                                                                                                                | England                                                                                                               |
| Country of article focus                                                                              | England                                                                                                                                                                                                | England                                                                                                               |
| <b>Health and social care personnel involved</b>                                                      | Staff in nursing homes and management teams of MLA (charity providing nursing home care)                                                                                                               | Coordinated approach between business sector, voluntary sector, Wirral Council and Age Action UK.                     |
| <b>Context for change (community, hospital, rehab or residential care)</b>                            | Community (nursing home)                                                                                                                                                                               | Community (vulnerable people including people living alone and carers of people with dementia)                        |
| <b>Innovation (What did they do or change?)</b>                                                       | Staff facilitated communication between dying and their family and friends in the absence of physical contact (saying goodbye through windows, passing messages through carers, telephone, cards)      | Distribution of tablets to people classed as vulnerable to: enable them to maintain contact with friends, family etc. |
| <b>Innovation (What did they do or change?)</b>                                                       | Staff moved into facility in order to minimise their own and residents’ exposure to virus. Reduce risk of contagion.                                                                                   | to access mindfulness and relaxation techniques on line to help combat mental strain of isolation                     |
| <b>Innovation (What did they do or change?)</b>                                                       | Virtual management team meetings across group using video conferencing to assist and provide practical support to each. Triage system to determine priority of response.                               | to access exercise programmes online to access mental stimulation through online games/quizzes                        |
| <b>Innovation (What did they do or change?)</b>                                                       | Recognition of emotional needs of residents and their families when resident dying.                                                                                                                    | Developing of user training package.                                                                                  |
| <b>Social processes (How or why did they do it? Motivations, reasonings, resources, competencies)</b> | Facilitation of communication between resident and loved ones in absence of physical contact.                                                                                                          | Coordinated approach between Age UK, Vodafone, Wirral Council and voluntary charitable groups.                        |
| <b>Social processes (How or why did they do it? Motivations, reasonings, resources, competencies)</b> | Adapting and finding new means of communication.                                                                                                                                                       | Recognition of negative effects of social isolation on vulnerable people                                              |
| <b>Social processes (How or why did they do it? Motivations, reasonings, resources, competencies)</b> | Dedication / commitment to role. Role expansion. Willing to sleep at nursing home to minimise risk of resident’s exposure to virus.                                                                    | Recognition of educational needs— development of training package                                                     |
| <b>Social processes (How or why did they do it? Motivations, reasonings, resources, competencies)</b> | Mutual recognition of challenges to each nursing home in group—team approach to problem solving, triaging on basis of most urgent needs, sharing                                                       | Communication/information sharing                                                                                     |

|                                      |            |                                                                                                                                          |                                               |
|--------------------------------------|------------|------------------------------------------------------------------------------------------------------------------------------------------|-----------------------------------------------|
|                                      | resources. | Willingness to share knowledge and resources. New ways of communicating with each other.<br>New means of communication<br>Role expansion | Teamwork—working beyond normal team boundary. |
| <b>New ways of working (Outcome)</b> |            | Working outside usual scope of practice—sharing knowledge and resources—<br>mutual benefit of each nursing home                          |                                               |

END
